# Supplementary material
Source: ML conference proceedings conference paper supplement (https://openreview.net/forum?id=HOOMjIUscgq)
Supplement: supplementary_material [file attachment]

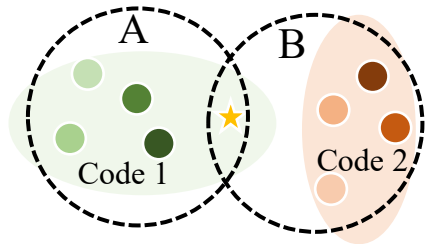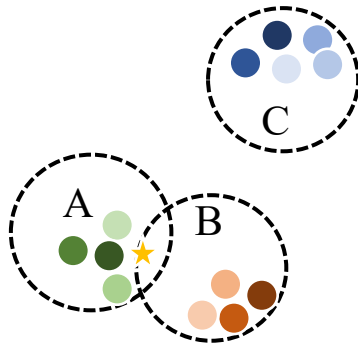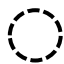

Synonym set

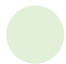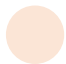

Cluster results

(a) SEM

(b) FTML

Synonym set A

- important
- major
- significant
- pivotal
- ★ substantial

Synonym set B

- enormous
- large
- huge
- vast
- ★ substantial

Synonym set C

- horrible
- horrific
- dreadful
- horrendous
- terrible
